# Supplementary material for: Statin-Related Myotoxicity: A Comprehensive Review of Pharmacokinetic, Pharmacogenomic and Muscle Components
Source: PubMed Central journal article supplement (PMC7019839; doi:10.3390/jcm9010022), 2019-12-20
Supplement: jcm-09-00022-s001.pdf [file jcm-09-00022-s001.pdf]

**Table 1. S1. Clinical factors associated with statin exposure.**

| Factor                             | Statin                            | Clinical Effect                                                                                                                                                          | References  |
|------------------------------------|-----------------------------------|--------------------------------------------------------------------------------------------------------------------------------------------------------------------------|-------------|
| Advanced age                       | ATV, LVT, PIT, PVT, SVT,          | -↑AUC: <b>ATV</b> (30%), <b>PIT</b> (30%), <b>PVT</b> (~37%)<br>-↑mean plasma level of HMG-CoA reductase inhibitory activity: <b>LVT</b> (45%), <b>SVT</b> (45%)         | [1-5]       |
|                                    | FVT, RVT                          | No significant difference                                                                                                                                                | [6,7]       |
| Gender                             | ATV                               | Women: 20% ↑ <b>ATV</b> C <sub>max</sub> , 10% ↓AUC                                                                                                                      | [1]         |
|                                    | FVT, PIT                          | Women: ↑ <b>FVT</b> or <b>PIT</b> AUC                                                                                                                                    | [6,8]       |
|                                    | PVT                               | Women: ↑ <b>PVT</b> AUC (in subjects homozygous wild type at <i>SLCO1B1</i> rs4149056)                                                                                   | [9]         |
|                                    | RVT                               | No significant difference                                                                                                                                                | [7,10]      |
|                                    | SVT                               | - <b>SVT acid</b> : ↑ exposure in women<br>- SVT: no significant difference                                                                                              | [11]        |
| Dose                               | ATV, FVT, LVT, PIT, PVT,RVT, SVT, | ↑ statin plasma exposure                                                                                                                                                 | [1-7]       |
| Evening compared to morning dosing | ATV, PVT                          | - <b>ATV</b> AUC ↓ by 29%<br>- <b>PVT</b> bioavailability ↓ by 60%                                                                                                       | [1,4,12]    |
|                                    | PIT, RVT                          | No significant difference in AUC                                                                                                                                         | [3,7,13]    |
| Ethnicity (compared to Caucasian)  |                                   |                                                                                                                                                                          |             |
| African American                   | PVT                               | 1.4 fold ↑ <b>PVT</b> AUC                                                                                                                                                | [14]        |
| Asian                              | ATV                               | No significant difference in ATV AUC                                                                                                                                     | [15]        |
| Asian-Indian                       | RVT                               | 26% non-significant ↑ in RVT AUC                                                                                                                                         | [16]        |
| East Asian                         | RVT                               | 64-84% ↑ <b>RVT</b> AUC                                                                                                                                                  | [16]        |
| Japanese                           | RVT, SVT, PIT                     | - 55% ↑ exposure to <b>RVT</b><br>- 34-68% ↑ exposure to <b>SVT acid</b><br>- no significant difference for PIT                                                          | [3,17,18]   |
| Mexican                            | PVT                               | No significant difference in AUC                                                                                                                                         | [19]        |
| Alcohol                            | FVT                               | - 30% ↑ <b>FVT</b> AUC in chronic alcohol consumption<br>- no significant difference in FVT AUC in acute alcohol consumption:                                            | [20]        |
|                                    | LVT                               | ~50% ↑ <b>LVT</b> AUC                                                                                                                                                    | [2]         |
| Co-administration with food        | PVT                               | ↓ <b>PVT</b> C <sub>max</sub> (by 49%) and AUC (by 31%)                                                                                                                  | [21]        |
|                                    | ATV, FVT, PIT                     | - Significant ↓ in C <sub>max</sub> ( <b>ATV</b> by 47.9%, <b>FVT</b> by 40-60%, <b>PIT</b> by 43%)<br>- Non-significant ↓ in AUC ( <b>ATV</b> 9-13%, <b>FVT</b> by 11%) | [3,6,22,23] |

|                                                                   |                                      |                                                                                                                                                                                 |             |
|-------------------------------------------------------------------|--------------------------------------|---------------------------------------------------------------------------------------------------------------------------------------------------------------------------------|-------------|
|                                                                   | RVT, SVT                             | No significant difference in AUC                                                                                                                                                | [5,7]       |
| Diabetes mellitus                                                 | ATV                                  | ↑ plasma concentrations of ATV and metabolites when sampled >5-24 hours post dose                                                                                               | [24]        |
| Hepatic impairment                                                | ATV, FVT, PIT, PVT                   | ↑ AUC: <b>ATV</b> (4-11 fold), <b>FVT</b> (2.5 fold), <b>PIT</b> (1.6-3.8 fold) <b>PVT</b> (34%)                                                                                | [1,3,6,25]  |
|                                                                   | RVT                                  | No significant difference                                                                                                                                                       | [26]        |
| Renal impairment                                                  | LVT, PIT, PVT, RVT                   | ↑ AUC: <b>LVT</b> (2 fold), <b>PIT</b> (2 fold), <b>PVT</b> (69%), <b>RVT</b> (3 fold)                                                                                          | [2-4,7]     |
|                                                                   | ATV, FVT                             | No significant difference                                                                                                                                                       | [1,27]      |
|                                                                   | SVT                                  | Potentially no difference                                                                                                                                                       | [28]        |
| Following bariatric surgery                                       | ATV                                  | - 2 fold ↑ <b>ATV</b> AUC 3-8 weeks after surgery<br>- ↓ <b>ATV</b> AUC ~2 years after surgery                                                                                  | [29]        |
| <b>Selected co-medications</b>                                    |                                      |                                                                                                                                                                                 |             |
| <b>Strong CYP3A4 inhibitors</b>                                   |                                      |                                                                                                                                                                                 |             |
| Itraconazole                                                      | ATV, LVT, PVT, RVT, SVT              | ↑ AUC: <b>ATV</b> (3.3 fold), <b>LVT</b> (>15-20 fold), <b>LVT acid</b> (15-20 fold), <b>PVT</b> (11-72%), <b>RVT</b> (28-39%), <b>SVT</b> (10 fold), <b>SVT acid</b> (19 fold) | [1,4,30-34] |
|                                                                   | PIT                                  | <b>PIT</b> AUC ↓ by 23%                                                                                                                                                         | [35]        |
|                                                                   | FVT                                  | No significant difference                                                                                                                                                       | [34]        |
| Ketoconazole                                                      | RVT                                  | No significant difference                                                                                                                                                       | [36]        |
| Clarithromycin                                                    | ATV, PVT, SVT                        | ↑ AUC: <b>ATV</b> (4.4. fold), <b>PVT</b> (2.1 fold), <b>SVT</b> (10 fold), <b>SVT acid</b> (12 fold)                                                                           | [1,4,37]    |
| <b>Moderate CYP3A4 inhibitors</b>                                 |                                      |                                                                                                                                                                                 |             |
| Erythromycin                                                      | ATV, PIT, SVT                        | ↑ AUC: <b>ATV</b> (33%), <b>PIT</b> (2.8 fold), <b>SVT</b> (6.2 fold), <b>SVT acid</b> (3.9 fold)                                                                               | [1,3,38,39] |
|                                                                   | RVT                                  | <b>RVT</b> AUC ↓ by 20%                                                                                                                                                         | [40]        |
|                                                                   | FVT                                  | No significant difference                                                                                                                                                       | [20]        |
| Grapefruit juice (low dose)                                       | ATV, LVT, PIT, SVT                   | ↑ AUC: <b>ATV</b> (40-83%), <b>LVT</b> (1.94 fold), <b>PIT</b> (14%), <b>SVT</b> (1.9-3.6 fold), <b>SVT acid</b> (1.3-3.3 fold)                                                 | [5,41-45]   |
|                                                                   | PVT                                  | No significant difference                                                                                                                                                       | [42]        |
| Diltiazem                                                         | ATV, LVT, SVT                        | ↑ AUC: <b>ATV</b> (51%), <b>LVT</b> (3.57 fold), <b>SVT</b> (3.10-4.6 fold), <b>SVT acid</b> (2.69 fold)                                                                        | [1,2,5]     |
|                                                                   | PIT                                  | 10% ↑ PIT AUC, but statistical significance unknown                                                                                                                             | [3]         |
|                                                                   | PVT                                  | No significant difference                                                                                                                                                       | [4]         |
| <b>Weak CYP3A4 inhibitors</b>                                     |                                      |                                                                                                                                                                                 |             |
| Amlodipine                                                        | ATV, SVT                             | ↑ AUC: <b>ATV</b> (18%), <b>SVT</b> (1.77 fold), <b>SVT acid</b> (1.58 fold)                                                                                                    | [5,46]      |
|                                                                   | FVT                                  | No significant different                                                                                                                                                        | [47]        |
| <b>Other drugs</b>                                                |                                      |                                                                                                                                                                                 |             |
| Ciclosporin<br>(inhibits CYP3A4,<br>OATP1B1/1B3/2B1, ABCG2, P-gp) | ATV, FVT, LVT, PIT,<br>PVT, RVT, SVT | ↑ AUC: <b>ATV</b> (8.7 fold), <b>FVT</b> (90%), <b>LVT</b> (5-8 fold), <b>PIT</b> (4.6 fold), <b>PVT</b> (3.8 fold), <b>RVT</b> (7 fold), <b>SVT</b> (8 fold)                   | [1-7,48]    |

|                                                  |                                   |                                                                                                                                                                                                         |           |
|--------------------------------------------------|-----------------------------------|---------------------------------------------------------------------------------------------------------------------------------------------------------------------------------------------------------|-----------|
| Fluconazole<br>(inhibits CYP2C9, 2C19 & 3A)      | FVT                               | 84% ↑ <b>FVT</b> AUC                                                                                                                                                                                    | [49]      |
|                                                  | PVT, RVT                          | No significant difference                                                                                                                                                                               | [49,50]   |
| Gemfibrozil<br>(inhibits CYP2C8, OATP1B1 & OAT3) | ATV, LVT acid, PIT, PVT, RVT, SVT | ↑ AUC: <b>ATV</b> (35%), <b>LVT acid</b> (2.8 fold), LVT (no significant difference), <b>PIT</b> (45%), <b>PVT</b> (2 fold), <b>RVT</b> (1.9 fold), <b>SVT</b> (1.35 fold), <b>SVT acid</b> (2.85 fold) | [51-56]   |
|                                                  | FVT                               | No significant difference                                                                                                                                                                               | [56,57]   |
| Letermovir (inhibits OATP1B1/1B3 & CYP3A)        | ATV                               | - 3 fold ↑ <b>ATV</b> AUC                                                                                                                                                                               | [58]      |
|                                                  | ATV                               | - 7 fold ↑ <b>ATV</b> AUC if single rifampicin dose co-administered with a single ATV dose<br>- 30% ↑ <b>ATV</b> AUC if ATV/rifampicin co-administered after a 5 day course of rifampicin               | [1,59,60] |
| Rifampicin<br>(induces CYP3A; inhibits OATP1B1)  | PIT                               | - <b>ATV</b> AUC ↓ by 80% if ATV given separately after a 5 day course of rifampicin<br>6.7 fold ↑ <b>PIT</b> AUC if single rifampicin dose co-administered with a single PIT dose                      | [61]      |
|                                                  | PVT                               | - 2.3 fold ↑ <b>PVT</b> AUC if single rifampicin dose co-administered with a single PVT dose<br>- <b>PVT</b> AUC ↓ by 31% if PVT given separately after a 5 day course of rifampicin                    | [62,63]   |
|                                                  | FVT, SVT                          | ↓ AUC if statin given separately following rifampicin pre-treatment: <b>FVT</b> (by 53%), <b>SVT</b> (by 87%), <b>SVT acid</b> (by 93%). (Probable ↓ in LVT AUC)                                        | [6,64,65] |
|                                                  | RVT                               | No significant difference when RVT given separately after a 6 day course of rifampicin                                                                                                                  | [66]      |
| Tocilizumab (inhibits IL-6R)                     | SVT                               | <b>SVT</b> AUC ↓ by 57%                                                                                                                                                                                 | [67]      |

Unless otherwise stated, reported changes were statistically significant (statin highlighted in bold font).

AUC = area under the concentration-time curve.

**Table S2. Genetic variants associated with statin exposure**

| Gene                                     | Variant                                                        | Comparison           | Statin                                                                                                                             | Effect                                                                                                                                                 | References |
|------------------------------------------|----------------------------------------------------------------|----------------------|------------------------------------------------------------------------------------------------------------------------------------|--------------------------------------------------------------------------------------------------------------------------------------------------------|------------|
| <i>SLCO1B1</i>                           | rs4149056<br>(521T>C, p.V174A)                                 | CC vs TT             | ATV                                                                                                                                | - ↑ AUC: <b>ATV</b> (2.44 fold, 144%), <b>2-OH ATV</b> (2.0 fold)<br>- Non-significant ↑ in AUC: <b>ATV L</b> (2.0 fold), <b>2-OH ATV L</b> (1.6 fold) | [68]       |
|                                          |                                                                |                      | FVT                                                                                                                                | 1.19 (19%) fold non-significant ↑ in FVT AUC                                                                                                           | [9]        |
|                                          |                                                                |                      | LVT                                                                                                                                | - 3.86 fold (286%) ↑ <b>LVT acid</b> AUC<br>- LVT AUC ↓ non-significantly by 16%                                                                       | [69]       |
|                                          |                                                                |                      | PIT                                                                                                                                | - 3.08 fold (208%) ↑ <b>PIT</b> AUC<br>- No significant difference in PIT L AUC                                                                        | [70]       |
|                                          |                                                                |                      | PVT                                                                                                                                | - 1.91 (91%) fold ↑ <b>PVT</b> AUC                                                                                                                     | [9]        |
|                                          |                                                                |                      | RVT                                                                                                                                | - 1.65 (65%) fold ↑ <b>RVT</b> AUC                                                                                                                     | [68]       |
|                                          |                                                                |                      | SVT                                                                                                                                | - 3.21 (221%) fold ↑ <b>SVT acid</b> AUC<br>- 1.43 fold non-significant ↑ in SVT AUC                                                                   | [71]       |
|                                          |                                                                |                      | rs2306283<br>(388A>G, p.N130D)                                                                                                     | Haplotype *14 (rs2306283 but not rs4149056) vs *1a<br>GG (*1b/*1b) vs AA (*1a/*1a)                                                                     | ATV        |
| <i>SLCO2B1</i>                           | rs12422149<br>(935G>A, p.R312Q)                                | AA vs GG             | SVT                                                                                                                                | 79% ↑ apparent clearance of <b>SVT acid</b>                                                                                                            | [17]       |
| <i>SLC10A1</i>                           | rs2296651 (p.S267F, *2)                                        | *2 carriers vs *1/*1 | RVT                                                                                                                                | - 57% ↑ <b>RVT</b> AUC<br>- No significant differences in RVT or N-desmethyl RVT plasma concentrations                                                 | [73,74]    |
| <i>SLC22A8</i>                           | rs2276299 (723T>A)                                             | A carriers vs TT     | PVT                                                                                                                                | No significant difference in renal clearance                                                                                                           | [75]       |
|                                          | rs749911923<br>(1166C>T, p.A389V)                              | CT vs CC             | PVT                                                                                                                                | No significant difference in renal clearance                                                                                                           | [75]       |
| <i>ABCC2</i>                             | rs113646094 (1446C>G)                                          | GC vs CC             | PVT                                                                                                                                | - ↓ PVT AUC by 68%                                                                                                                                     | [76]       |
| <i>ABCB1</i>                             | rs1128503-rs2032582-<br>rs1045642<br>(1236C-T-2677G-T-3435C-T) | TTT/TTT vs CGC/CGC   | ATV                                                                                                                                | - 55% ↑ <b>ATV</b> AUC<br>- No significant differences for ATV L                                                                                       | [77]       |
|                                          |                                                                |                      | SVT                                                                                                                                | - 60% ↑ <b>SVT acid</b> AUC<br>- No significant differences for SVT                                                                                    | [77]       |
|                                          |                                                                |                      | FVT                                                                                                                                | No significant differences                                                                                                                             | [78]       |
|                                          |                                                                |                      | LVT                                                                                                                                | No significant differences                                                                                                                             | [78]       |
|                                          |                                                                |                      | PVT                                                                                                                                | No significant differences                                                                                                                             | [78]       |
|                                          |                                                                |                      | RVT                                                                                                                                | No significant differences                                                                                                                             | [78]       |
| rs2032582-rs1045642<br>(2677G-T-3435C-T) | TT/TT vs GG/CC and GT/CT                                       | ATV                  | - ↑ elimination $t_{1/2}$ : <b>ATV</b> , <b>ATV L</b> , <b>2-OH ATV</b> , <b>2-OH ATV L</b><br>- No significant differences in AUC | [79]                                                                                                                                                   |            |

|                |                                                                  |                                                               |     |                                                                                                                                                                               |         |
|----------------|------------------------------------------------------------------|---------------------------------------------------------------|-----|-------------------------------------------------------------------------------------------------------------------------------------------------------------------------------|---------|
| <i>ABCB11</i>  | rs2287622<br>(1331T>C, p.V444A)                                  | CC vs CT vs TT                                                | PVT | No significant differences                                                                                                                                                    | [14]    |
|                | rs11568364<br>(2029A>G, p.M677V)                                 | GG vs GA vs GG                                                | PVT | No significant differences                                                                                                                                                    | [14]    |
| <i>ABCC2</i>   | rs717620 (-24C>T)                                                | TT vs CT vs CC                                                | PIT | - ↓ <b>PIT</b> AUC<br>- <b>PIT</b> AUC ↓ by 62% in TT compared to CC subjects                                                                                                 | [80]    |
|                | rs113646094<br>(1446C>G, p.T482=)                                | CG vs CC                                                      | PVT | <b>PVT</b> AUC ↓ by 67%                                                                                                                                                       | [76]    |
| <i>ABCG2</i>   | rs2231142<br>(421C>A, p.Q141K)                                   | AA vs CC                                                      | ATV | - ↑ AUC: <b>ATV</b> (1.7 fold), <b>ATV L</b> (1.9 fold)<br>- Non-significant ↑ in AUC: 2-OH <b>ATV</b> (1.4 fold), 2-OH <b>ATV L</b> (1.5 fold), 4-OH <b>ATV L</b> (1.4 fold) | [81]    |
|                |                                                                  |                                                               | FVT | 1.7 fold ↑ <b>FVT</b> AUC                                                                                                                                                     | [82]    |
|                |                                                                  |                                                               | PIT | No significant differences                                                                                                                                                    | [80,83] |
|                |                                                                  |                                                               | PVT | No significant differences                                                                                                                                                    | [82]    |
|                |                                                                  |                                                               | RVT | - 2.4 fold ↑ <b>RVT</b> AUC<br>- 2 fold ↑ in <b>N-desmethyl RVT</b> plasma concentration                                                                                      | [73,81] |
|                |                                                                  |                                                               | SVT | - 2.1 fold ↑ <b>SVT</b> AUC<br>- 1.2 non-significant ↑ in SVT acid AUC                                                                                                        | [82]    |
| <i>PPARA</i>   | rs4253728<br>(209-1003G>A)                                       | GA vs GG                                                      | ATV | ↓ <b>2-OH ATV</b> to ATV AUC ratio                                                                                                                                            | [84]    |
|                |                                                                  | GA/AA vs GG                                                   | SVT | 24% ↓ apparent clearance of <b>SVT acid</b>                                                                                                                                   | [17]    |
|                | rs1799853 (p.R144C, *2)                                          | *2/*2 vs *1/*1                                                | FVT | No significant differences                                                                                                                                                    | [85]    |
|                |                                                                  | *3/*3 vs *1/*1                                                | FVT | 3.1-5.0 fold ↑ in <b>FVT</b> AUC                                                                                                                                              | [85]    |
| <i>CYP2C9</i>  | rs1057910 (p.I359L, *3)                                          | *3 carriers vs 1/*1                                           | PIT | - 2.9 fold ↑ in <b>PIT</b> AUC<br>- 1.7 fold ↑ in <b>PIT L</b> AUC                                                                                                            | [83]    |
|                |                                                                  |                                                               | RVT | No significant differences in RVT or N-desmethyl RVT plasma concentrations                                                                                                    | [10,73] |
|                |                                                                  |                                                               | SVT | No significant differences                                                                                                                                                    | [86]    |
| <i>CYP2C19</i> | - rs4244285 (p.P227=, *2)<br>- rs4986893 (p.W212Stop gained, *3) | *2/*2, *2/*3 or *3/*3 (PMs)<br>vs *1/*2, *1/*3 or *1/*1 (EMs) | RVT | - No significant differences in RVT, N-desmethyl RVT or RVT L pharmacokinetics                                                                                                | [73,87] |
| <i>CYP2D6</i>  | whole gene deletion (*5)                                         | *5/*5 vs wt/wt (*1 or *2)                                     | LVT | - 5.1 fold ↑ <b>LVT</b> AUC<br>- no significant difference in LVT acid AUC                                                                                                    | [88]    |
|                |                                                                  | *5/wt vs wt/wt                                                | SVT | - <b>SVT</b> AUC ↓ by 23%<br>- no significant difference in SVT acid AUC                                                                                                      | [89]    |
|                | rs1065852 (p.S34P, *10)                                          | *10/*10 vs wt/wt (*1 or *2)                                   | LVT | - 2.2 fold ↑ <b>LVT</b> AUC<br>- no significant difference in LVT acid AUC                                                                                                    | [88]    |
|                | rs5030865 (p.G169Stop gained, *14)                               | *14/*14 vs wt/wt                                              | SVT | - 1.5 fold ↑ <b>SVT</b> AUC<br>- no significant difference in SVT acid AUC                                                                                                    | [89]    |

|               |                  |                       |     |                                                                                                                                                                                                                                     |         |
|---------------|------------------|-----------------------|-----|-------------------------------------------------------------------------------------------------------------------------------------------------------------------------------------------------------------------------------------|---------|
|               | rs28371725 (*41) | *41/*41 vs wt/wt      | SVT | ↑ C <sub>max</sub> of both <b>SVT</b> and <b>SVT acid</b>                                                                                                                                                                           | [89]    |
|               |                  |                       | ATV | ↓ <b>2-OH ATV</b> to ATV AUC ratio                                                                                                                                                                                                  | [84]    |
| <i>CYP3A4</i> | rs35599367 (*22) | *22 carriers vs *1/*1 | SVT | White patients:<br>- 14% ↑ <b>SVT acid</b> concentration<br>- 20% non-significantly ↑ SVT concentration<br>African American patients:<br>- 170% ↑ <b>SVT</b> concentration<br>- no significant difference in SVT acid concentration | [90]    |
|               |                  | *3/*3 vs *1 carriers  | ATV | - 36% ↑ <b>ATV L AUC</b><br>- No significant difference in ATV AUC                                                                                                                                                                  | [91]    |
| <i>CYP3A5</i> | rs776746 (*3)    | *3/*3 vs *1/*3        | PIT | No significant differences for PIT or PIT L                                                                                                                                                                                         | [83]    |
|               |                  | *3/*3 vs *1/*3        | RVT | No significant differences                                                                                                                                                                                                          | [10]    |
|               |                  | *3/*3 vs *1/*1        | SVT | - 3.3 fold ↑ <b>SVT AUC</b><br>- No significant difference in SVT acid plasma levels                                                                                                                                                | [90,92] |
| <i>UGT1A1</i> | *28              | *28 vs *1/*1          | ATV | - 41% ↓ <b>ATV L AUC</b>                                                                                                                                                                                                            | [93]    |
| <i>UGT1A3</i> | *2               | *2/*2 vs *1/*1        | ATV | - 72% ↑ <b>ATV L AUC</b><br>- 160% ↑ <b>2OH ATV L AUC</b>                                                                                                                                                                           | [94,95] |
|               |                  | *1/*2 vs *1/*1        |     | ↑ <b>ATV L</b> to ATV AUC ratio                                                                                                                                                                                                     | [94]    |

Unless otherwise stated, reported changes were statistically significant (statin highlighted in bold font).

AUC = area under the concentration-time curve; wt = wild type.

## Supplementary References

1. Pfizer Inc. Lipitor- atorvastatin calcium trihydrate tablet, film coated. Highlights of prescribing information. <http://labeling.pfizer.com/ShowLabeling.aspx?id=587> (13 May),
2. Merck & Co, I. Mevacor (lovastatin) tablets description. [https://www.merck.com/product/usa/pi\\_circulars/m/mevacor/mevacor\\_pi.pdf](https://www.merck.com/product/usa/pi_circulars/m/mevacor/mevacor_pi.pdf) (7 July),
3. Kowa Pharmaceuticals. Livalo (pitavastatin) tablet - highlights of prescribing information. [http://www.accessdata.fda.gov/drugsatfda\\_docs/label/2012/022363s008s0091bl.pdf](http://www.accessdata.fda.gov/drugsatfda_docs/label/2012/022363s008s0091bl.pdf) (7 July),
4. Bristol-Myers Squibb Company. Pravachol (pravastatin) tablets - highlights of prescribing information. [http://packageinserts.bms.com/pi/pi\\_pravachol.pdf](http://packageinserts.bms.com/pi/pi_pravachol.pdf) (7 July),
5. Merck & Co, I. Zocor (simvastatin) tablets - highlights of prescribing information. [https://www.merck.com/product/usa/pi\\_circulars/z/zocor/zocor\\_pi.pdf](https://www.merck.com/product/usa/pi_circulars/z/zocor/zocor_pi.pdf) (7 July),
6. Novartis. Lescol (fluvastatin dosium) - highlights of prescribing information. <https://www.pharma.us.novartis.com/sites/www.pharma.us.novartis.com/files/Lescol.pdf> (7 July),
7. AstraZeneca. Crestor (rosuvastatin calcium tablets) - highlights of prescribing information. [http://www.accessdata.fda.gov/drugsatfda\\_docs/label/2010/021366s0161bl.pdf](http://www.accessdata.fda.gov/drugsatfda_docs/label/2010/021366s0161bl.pdf) (3 October),
8. RxList. Livalo (pitavastatin). <http://www.rxlist.com/livalo-drug/clinical-pharmacology.htm> (7 July),
9. Niemi, M.; Pasanen, M.K.; Neuvonen, P.J. Slco1b1 polymorphism and sex affect the pharmacokinetics of pravastatin but not fluvastatin. *Clinical pharmacology and therapeutics* **2006**, *80*, 356-366.
10. Zhou, Q.; Ruan, Z.R.; Yuan, H.; Xu, D.H.; Zeng, S. Abcb1 gene polymorphisms, abcb1 haplotypes and abcg2 c.421c > a are determinants of inter-subject variability in rosuvastatin pharmacokinetics. *Die Pharmazie* **2013**, *68*, 129-134.
11. Yang, W.; Xu, H.; Song, Y.; Wang, X.; Ren, X.; Zhao, D.; Cai, Y.; Zhang, S.; Huang, J.; Zhang, L.R., *et al.* Pharmacokinetics of simvastatin lactone and its active metabolite simvastatin hydroxy acid in healthy chinese male and female volunteers. *International journal of clinical pharmacology and therapeutics* **2014**, *52*, 151-158.
12. Cilla, D.D., Jr.; Gibson, D.M.; Whitfield, L.R.; Sedman, A.J. Pharmacodynamic effects and pharmacokinetics of atorvastatin after administration to normocholesterolemic subjects in the morning and evening. *Journal of clinical pharmacology* **1996**, *36*, 604-609.
13. Martin, P.D.; Mitchell, P.D.; Schneck, D.W. Pharmacodynamic effects and pharmacokinetics of a new hmg-coa reductase inhibitor, rosuvastatin, after morning or evening administration in healthy volunteers. *British journal of clinical pharmacology* **2002**, *54*, 472-477.
14. Ho, R.H.; Choi, L.; Lee, W.; Mayo, G.; Schwarz, U.I.; Tirona, R.G.; Bailey, D.G.; Stein, C.M.; Kim, R.B. Effect of drug transporter genotypes on pravastatin disposition in european- and african-american participants. *Pharmacogenetics and genomics* **2007**, *17*, 647-656.
15. Gandelman, K.; Fung, G.L.; Messig, M.; Laskey, R. Systemic exposure to atorvastatin between asian and caucasian subjects: A combined analysis of 22 studies. *American journal of therapeutics* **2012**, *19*, 164-173.
16. Birmingham, B.K.; Bujac, S.R.; Azumaya, C.T.; Zalikowski, J.; Chen, Y.; Kim, K.; Ambrose, H.J. Rosuvastatin pharmacokinetics and pharmacogenetics in caucasian and asian subjects residing in the united states. *European journal of clinical pharmacology* **2015**, *71*, 329-340.
17. Tsamandouras, N.; Dickinson, G.; Guo, Y.; Hall, S.; Rostami-Hodjegan, A.; Galetin, A.; Aarons, L. Identification of the effect of multiple polymorphisms on the pharmacokinetics of simvastatin and simvastatin acid using a population-modeling approach. *Clinical pharmacology and therapeutics* **2014**, *96*, 90-100.
18. Birmingham, B.K.; Bujac, S.R.; Elsby, R.; Azumaya, C.T.; Wei, C.; Chen, Y.; Mosqueda-Garcia, R.; Ambrose, H.J. Impact of abcg2 and slco1b1 polymorphisms on pharmacokinetics of rosuvastatin, atorvastatin and simvastatin acid in caucasian and asian subjects: A class effect? *European journal of clinical pharmacology* **2015**, *71*, 341-355.

19. Escobar, Y.; Venturelli, C.R.; Hoyo-Vadillo, C. Pharmacokinetic properties of pravastatin in mexicans: An open-label study in healthy adult volunteers. *Current therapeutic research, clinical and experimental* **2005**, *66*, 238-246.
20. Scripture, C.D.; Pieper, J.A. Clinical pharmacokinetics of fluvastatin. *Clinical pharmacokinetics* **2001**, *40*, 263-281.
21. Pan, H.Y.; DeVault, A.R.; Brescia, D.; Willard, D.A.; McGovern, M.E.; Whigan, D.B.; Ivashkiv, E. Effect of food on pravastatin pharmacokinetics and pharmacodynamics. *International journal of clinical pharmacology, therapy, and toxicology* **1993**, *31*, 291-294.
22. Radulovic, L.L.; Cilla, D.D.; Posvar, E.L.; Sedman, A.J.; Whitfield, L.R. Effect of food on the bioavailability of atorvastatin, an hmg-coa reductase inhibitor. *Journal of clinical pharmacology* **1995**, *35*, 990-994.
23. Smith, H.T.; Jokubaitis, L.A.; Troendle, A.J.; Hwang, D.S.; Robinson, W.T. Pharmacokinetics of fluvastatin and specific drug interactions. *American journal of hypertension* **1993**, *6*, 375s-382s.
24. Dostalek, M.; Sam, W.J.; Paryani, K.R.; Macwan, J.S.; Gohh, R.Y.; Akhlaghi, F. Diabetes mellitus reduces the clearance of atorvastatin lactone: Results of a population pharmacokinetic analysis in renal transplant recipients and in vitro studies using human liver microsomes. *Clinical pharmacokinetics* **2012**, *51*, 591-606.
25. Hatanaka, T. Clinical pharmacokinetics of pravastatin: Mechanisms of pharmacokinetic events. *Clinical pharmacokinetics* **2000**, *39*, 397-412.
26. Simonson, S.G.; Martin, P.D.; Mitchell, P.; Schneck, D.W.; Lasseter, K.C.; Warwick, M.J. Pharmacokinetics and pharmacodynamics of rosuvastatin in subjects with hepatic impairment. *European journal of clinical pharmacology* **2003**, *58*, 669-675.
27. Appel-Dingemanse, S.; Smith, T.; Merz, M. Pharmacokinetics of fluvastatin in subjects with renal impairment and nephrotic syndrome. *Journal of clinical pharmacology* **2002**, *42*, 312-318.
28. Launay-Vacher, V.; Izzedine, H.; Deray, G. Statins' dosage in patients with renal failure and cyclosporine drug-drug interactions in transplant recipient patients. *International journal of cardiology* **2005**, *101*, 9-17.
29. Jakobsen, G.S.; Skottheim, I.B.; Sandbu, R.; Christensen, H.; Roislien, J.; Asberg, A.; Hjelmessaeth, J. Long-term effects of gastric bypass and duodenal switch on systemic exposure of atorvastatin. *Surgical endoscopy* **2013**, *27*, 2094-2101.
30. Cooper, K.J.; Martin, P.D.; Dane, A.L.; Warwick, M.J.; Schneck, D.W.; Cantarini, M.V. Effect of itraconazole on the pharmacokinetics of rosuvastatin. *Clinical pharmacology and therapeutics* **2003**, *73*, 322-329.
31. Neuvonen, P.J.; Jalava, K.M. Itraconazole drastically increases plasma concentrations of lovastatin and lovastatin acid. *Clinical pharmacology and therapeutics* **1996**, *60*, 54-61.
32. Neuvonen, P.J.; Kantola, T.; Kivisto, K.T. Simvastatin but not pravastatin is very susceptible to interaction with the cyp3a4 inhibitor itraconazole. *Clinical pharmacology and therapeutics* **1998**, *63*, 332-341.
33. Mazzu, A.L.; Lasseter, K.C.; Shamblen, E.C.; Agarwal, V.; Lettieri, J.; Sundaresen, P. Itraconazole alters the pharmacokinetics of atorvastatin to a greater extent than either cerivastatin or pravastatin. *Clinical pharmacology and therapeutics* **2000**, *68*, 391-400.
34. Kivisto, K.T.; Kantola, T.; Neuvonen, P.J. Different effects of itraconazole on the pharmacokinetics of fluvastatin and lovastatin. *British journal of clinical pharmacology* **1998**, *46*, 49-53.
35. Nakagawa, S.; Gosho, M.; Inazu, Y.; Hounslow, N. Pitavastatin concentrations are not increased by cyp3a4 inhibitor itraconazole in healthy subjects. *Clinical pharmacology in drug development* **2013**, *2*, 195-200.
36. Cooper, K.J.; Martin, P.D.; Dane, A.L.; Warwick, M.J.; Raza, A.; Schneck, D.W. Lack of effect of ketoconazole on the pharmacokinetics of rosuvastatin in healthy subjects. *British journal of clinical pharmacology* **2003**, *55*, 94-99.
37. Jacobson, T.A. Comparative pharmacokinetic interaction profiles of pravastatin, simvastatin, and atorvastatin when coadministered with cytochrome p450 inhibitors. *The American journal of cardiology* **2004**, *94*, 1140-1146.



38. Kantola, T.; Kivisto, K.T.; Neuvonen, P.J. Erythromycin and verapamil considerably increase serum simvastatin and simvastatin acid concentrations. *Clinical pharmacology and therapeutics* **1998**, *64*, 177-182.
39. Siedlik, P.H.; Olson, S.C.; Yang, B.B.; Stern, R.H. Erythromycin coadministration increases plasma atorvastatin concentrations. *Journal of clinical pharmacology* **1999**, *39*, 501-504.
40. Cooper, K.J.; Martin, P.D.; Dane, A.L.; Warwick, M.J.; Raza, A.; Schneck, D.W. The effect of erythromycin on the pharmacokinetics of rosuvastatin. *European journal of clinical pharmacology* **2003**, *59*, 51-56.
41. Ando, H.; Tsuruoka, S.; Yanagihara, H.; Sugimoto, K.; Miyata, M.; Yamazoe, Y.; Takamura, T.; Kaneko, S.; Fujimura, A. Effects of grapefruit juice on the pharmacokinetics of pitavastatin and atorvastatin. *British journal of clinical pharmacology* **2005**, *60*, 494-497.
42. Fukazawa, I.; Uchida, N.; Uchida, E.; Yasuhara, H. Effects of grapefruit juice on pharmacokinetics of atorvastatin and pravastatin in Japanese. *British journal of clinical pharmacology* **2004**, *57*, 448-455.
43. Lilja, J.J.; Neuvonen, M.; Neuvonen, P.J. Effects of regular consumption of grapefruit juice on the pharmacokinetics of simvastatin. *British journal of clinical pharmacology* **2004**, *58*, 56-60.
44. Rogers, J.D.; Zhao, J.; Liu, L.; Amin, R.D.; Gagliano, K.D.; Porras, A.G.; Blum, R.A.; Wilson, M.F.; Stepanavage, M.; Vega, J.M. Grapefruit juice has minimal effects on plasma concentrations of lovastatin-derived 3-hydroxy-3-methylglutaryl coenzyme A reductase inhibitors. *Clinical pharmacology and therapeutics* **1999**, *66*, 358-366.
45. Hu, M.; Mak, V.W.; Yin, O.Q.; Chu, T.T.; Tomlinson, B. Effects of grapefruit juice and *slco1b1* 388a>g polymorphism on the pharmacokinetics of pitavastatin. *Drug metabolism and pharmacokinetics* **2013**, *28*, 104-108.
46. Drugs.com. Amlodipine and atorvastatin tablets. <https://www.drugs.com/pro/amlodipine-and-atorvastatin-tablets.html> (12 July),
47. Prasad, P.P.; Stypinski, D.; Vyas, K.H.; Gonasun, L. Lack of interaction between modified-release fluvastatin and amlodipine in healthy subjects. *Clinical drug investigation* **2004**, *24*, 323-331.
48. Ichimaru, N.; Takahara, S.; Kokado, Y.; Wang, J.D.; Hatori, M.; Kameoka, H.; Inoue, T.; Okuyama, A. Changes in lipid metabolism and effect of simvastatin in renal transplant recipients induced by cyclosporine or tacrolimus. *Atherosclerosis* **2001**, *158*, 417-423.
49. Kantola, T.; Backman, J.T.; Niemi, M.; Kivisto, K.T.; Neuvonen, P.J. Effect of fluconazole on plasma fluvastatin and pravastatin concentrations. *European journal of clinical pharmacology* **2000**, *56*, 225-229.
50. Cooper, K.J.; Martin, P.D.; Dane, A.L.; Warwick, M.J.; Schneck, D.W.; Cantarini, M.V. The effect of fluconazole on the pharmacokinetics of rosuvastatin. *European journal of clinical pharmacology* **2002**, *58*, 527-531.
51. Kyrklund, C.; Backman, J.T.; Neuvonen, M.; Neuvonen, P.J. Gemfibrozil increases plasma pravastatin concentrations and reduces pravastatin renal clearance. *Clinical pharmacology and therapeutics* **2003**, *73*, 538-544.
52. Whitfield, L.R.; Porcari, A.R.; Alvey, C.; Abel, R.; Bullen, W.; Hartman, D. Effect of gemfibrozil and fenofibrate on the pharmacokinetics of atorvastatin. *Journal of clinical pharmacology* **2011**, *51*, 378-388.
53. Matthew, P.; Cuddy, R.; Tracewell, W.G.; Salazar, D. An open-label study on the pharmacokinetics (pk) of pitavastatin (nk-104) when administered concomitantly with fenofibrate or gemfibrozil in healthy volunteers (abstract). *Clinical pharmacology and therapeutics* **2004**, *75*, 33.
54. Schneck, D.W.; Birmingham, B.K.; Zalikowski, J.A.; Mitchell, P.D.; Wang, Y.; Martin, P.D.; Lasseter, K.C.; Brown, C.D.; Windass, A.S.; Raza, A. The effect of gemfibrozil on the pharmacokinetics of rosuvastatin. *Clinical pharmacology and therapeutics* **2004**, *75*, 455-463.
55. Backman, J.T.; Kyrklund, C.; Kivisto, K.T.; Wang, J.S.; Neuvonen, P.J. Plasma concentrations of active simvastatin acid are increased by gemfibrozil. *Clinical pharmacology and therapeutics* **2000**, *68*, 122-129.

56. Kyrklund, C.; Backman, J.T.; Kivisto, K.T.; Neuvonen, M.; Laitila, J.; Neuvonen, P.J. Plasma concentrations of active lovastatin acid are markedly increased by gemfibrozil but not by bezafibrate. *Clinical pharmacology and therapeutics* **2001**, *69*, 340-345.
57. Spence, J.D.; Munoz, C.E.; Hendricks, L.; Latchinian, L.; Khouri, H.E. Pharmacokinetics of the combination of fluvastatin and gemfibrozil. *The American journal of cardiology* **1995**, *76*, 80a-83a.
58. Merck Sharp & Dohme Corp. Prevymis (letermovir) highlights of prescribing information. [https://www.accessdata.fda.gov/drugsatfda\\_docs/label/2017/209939Orig1s000,209940Orig1s000lbl.pdf](https://www.accessdata.fda.gov/drugsatfda_docs/label/2017/209939Orig1s000,209940Orig1s000lbl.pdf) (07 November),
59. Backman, J.T.; Luurila, H.; Neuvonen, M.; Neuvonen, P.J. Rifampin markedly decreases and gemfibrozil increases the plasma concentrations of atorvastatin and its metabolites. *Clinical pharmacology and therapeutics* **2005**, *78*, 154-167.
60. Rhoda Lee, C.; Sharp, J.; Baxter, K. Drug interactions: Cytochrome p450 isoenzymes not the only interaction mechanism. <http://www.pharmaceutical-journal.com/learning/learning-article/drug-interactions-cytochrome-p450-isoenzymes-not-the-only-interaction-mechanism/11098984.article> (12 July),
61. Chen, Y.; Zhang, W.; Huang, W.H.; Tan, Z.R.; Wang, Y.C.; Huang, X.; Zhou, H.H. Effect of a single-dose rifampin on the pharmacokinetics of pitavastatin in healthy volunteers. *European journal of clinical pharmacology* **2013**, *69*, 1933-1938.
62. Deng, S.; Chen, X.P.; Cao, D.; Yin, T.; Dai, Z.Y.; Luo, J.; Tang, L.; Li, Y.J. Effects of a concomitant single oral dose of rifampicin on the pharmacokinetics of pravastatin in a two-phase, randomized, single-blind, placebo-controlled, crossover study in healthy chinese male subjects. *Clinical therapeutics* **2009**, *31*, 1256-1263.
63. Kyrklund, C.; Backman, J.T.; Neuvonen, M.; Neuvonen, P.J. Effect of rifampicin on pravastatin pharmacokinetics in healthy subjects. *British journal of clinical pharmacology* **2004**, *57*, 181-187.
64. Kyrklund, C.; Backman, J.T.; Kivisto, K.T.; Neuvonen, M.; Laitila, J.; Neuvonen, P.J. Rifampin greatly reduces plasma simvastatin and simvastatin acid concentrations. *Clinical pharmacology and therapeutics* **2000**, *68*, 592-597.
65. Neuvonen, P.J.; Backman, J.T.; Niemi, M. Pharmacokinetic comparison of the potential over-the-counter statins simvastatin, lovastatin, fluvastatin and pravastatin. *Clinical pharmacokinetics* **2008**, *47*, 463-474.
66. Zhang, W.; Deng, S.; Chen, X.P.; Zhou, G.; Xie, H.T.; He, F.Y.; Cao, D.; Li, Y.J.; Zhou, H.H. Pharmacokinetics of rosuvastatin when coadministered with rifampicin in healthy males: A randomized, single-blind, placebo-controlled, crossover study. *Clinical therapeutics* **2008**, *30*, 1283-1289.
67. Schmitt, C.; Kuhn, B.; Zhang, X.; Kivitz, A.J.; Grange, S. Disease-drug-drug interaction involving tocilizumab and simvastatin in patients with rheumatoid arthritis. *Clinical pharmacology and therapeutics* **2011**, *89*, 735-740.
68. Pasanen, M.K.; Fredrikson, H.; Neuvonen, P.J.; Niemi, M. Different effects of slco1b1 polymorphism on the pharmacokinetics of atorvastatin and rosuvastatin. *Clinical pharmacology and therapeutics* **2007**, *82*, 726-733.
69. Tornio, A.; Vakkilainen, J.; Neuvonen, M.; Backman, J.T.; Neuvonen, P.J.; Niemi, M. Slco1b1 polymorphism markedly affects the pharmacokinetics of lovastatin acid. *Pharmacogenetics and genomics* **2015**.
70. Ieiri, I.; Suwannakul, S.; Maeda, K.; Uchimar, H.; Hashimoto, K.; Kimura, M.; Fujino, H.; Hirano, M.; Kusuhara, H.; Irie, S., *et al.* Slco1b1 (oatp1b1, an uptake transporter) and abcg2 (bcrp, an efflux transporter) variant alleles and pharmacokinetics of pitavastatin in healthy volunteers. *Clinical pharmacology and therapeutics* **2007**, *82*, 541-547.
71. Pasanen, M.K.; Neuvonen, M.; Neuvonen, P.J.; Niemi, M. Slco1b1 polymorphism markedly affects the pharmacokinetics of simvastatin acid. *Pharmacogenetics and genomics* **2006**, *16*, 873-879.
72. Nies, A.T.; Niemi, M.; Burk, O.; Winter, S.; Zanger, U.M.; Stieger, B.; Schwab, M.; Schaeffeler, E. Genetics is a major determinant of expression of the human hepatic uptake transporter oatp1b1, but not of oatp1b3 and oatp2b1. *Genome medicine* **2013**, *5*, 1.

73. Lee, H.K.; Hu, M.; Lui, S.; Ho, C.S.; Wong, C.K.; Tomlinson, B. Effects of polymorphisms in *abcg2*, *slco1b1*, *slc10a1* and *cyp2c9/19* on plasma concentrations of rosuvastatin and lipid response in chinese patients. *Pharmacogenomics* **2013**, *14*, 1283-1294.
74. Lou, X.Y.; Zhang, W.; Wang, G.; Hu, D.L.; Guo, D.; Tan, Z.R.; Zhou, H.H.; Chen, Y.; Bao, H.H. The effect of *na<sup>+</sup>/taurocholate* cotransporting polypeptide (*ntcp*) c.800c > t polymorphism on rosuvastatin pharmacokinetics in chinese healthy males. *Die Pharmazie* **2014**, *69*, 775-779.
75. Nishizato, Y.; Ieiri, I.; Suzuki, H.; Kimura, M.; Kawabata, K.; Hirota, T.; Takane, H.; Irie, S.; Kusuhara, H.; Urasaki, Y., *et al.* Polymorphisms of *oatp-c* (*slc21a6*) and *oat3* (*slc22a8*) genes: Consequences for pravastatin pharmacokinetics. *Clinical pharmacology and therapeutics* **2003**, *73*, 554-565.
76. Niemi, M.; Arnold, K.A.; Backman, J.T.; Pasanen, M.K.; Godtel-Armbrust, U.; Wojnowski, L.; Zanger, U.M.; Neuvonen, P.J.; Eichelbaum, M.; Kivisto, K.T., *et al.* Association of genetic polymorphism in *abcc2* with hepatic multidrug resistance-associated protein 2 expression and pravastatin pharmacokinetics. *Pharmacogenetics and genomics* **2006**, *16*, 801-808.
77. Keskitalo, J.E.; Kurkinen, K.J.; Neuvonen, P.J.; Niemi, M. *Abcb1* haplotypes differentially affect the pharmacokinetics of the acid and lactone forms of simvastatin and atorvastatin. *Clinical pharmacology and therapeutics* **2008**, *84*, 457-461.
78. Keskitalo, J.E.; Kurkinen, K.J.; Neuvonen, M.; Backman, J.T.; Neuvonen, P.J.; Niemi, M. No significant effect of *abcb1* haplotypes on the pharmacokinetics of fluvastatin, pravastatin, lovastatin, and rosuvastatin. *British journal of clinical pharmacology* **2009**, *68*, 207-213.
79. Lee, Y.J.; Lee, M.G.; Lim, L.A.; Jang, S.B.; Chung, J.Y. Effects of *slco1b1* and *abcb1* genotypes on the pharmacokinetics of atorvastatin and 2-hydroxyatorvastatin in healthy korean subjects. *International journal of clinical pharmacology and therapeutics* **2010**, *48*, 36-45.
80. Oh, E.S.; Kim, C.O.; Cho, S.K.; Park, M.S.; Chung, J.Y. Impact of *abcc2*, *abcg2* and *slco1b1* polymorphisms on the pharmacokinetics of pitavastatin in humans. *Drug metabolism and pharmacokinetics* **2013**, *28*, 196-202.
81. Keskitalo, J.E.; Zolk, O.; Fromm, M.F.; Kurkinen, K.J.; Neuvonen, P.J.; Niemi, M. *Abcg2* polymorphism markedly affects the pharmacokinetics of atorvastatin and rosuvastatin. *Clinical pharmacology and therapeutics* **2009**, *86*, 197-203.
82. Keskitalo, J.E.; Pasanen, M.K.; Neuvonen, P.J.; Niemi, M. Different effects of the *abcg2* c.421c>a snp on the pharmacokinetics of fluvastatin, pravastatin and simvastatin. *Pharmacogenomics* **2009**, *10*, 1617-1624.
83. Zhou, Q.; Chen, Q.X.; Ruan, Z.R.; Yuan, H.; Xu, H.M.; Zeng, S. *Cyp2c9\*3*(1075a > c), *abcb1* and *slco1b1* genetic polymorphisms and gender are determinants of inter-subject variability in pitavastatin pharmacokinetics. *Die Pharmazie* **2013**, *68*, 187-194.
84. Klein, K.; Thomas, M.; Winter, S.; Nussler, A.K.; Niemi, M.; Schwab, M.; Zanger, U.M. *Ppara*: A novel genetic determinant of *cyp3a4* in vitro and in vivo. *Clinical pharmacology and therapeutics* **2012**, *91*, 1044-1052.
85. Kirchheiner, J.; Kudlicz, D.; Meisel, C.; Bauer, S.; Meineke, I.; Roots, I.; Brockmoller, J. Influence of *cyp2c9* polymorphisms on the pharmacokinetics and cholesterol-lowering activity of (-)-3s,5r-fluvastatin and (+)-3r,5s-fluvastatin in healthy volunteers. *Clinical pharmacology and therapeutics* **2003**, *74*, 186-194.
86. Zhou, Q.; Ruan, Z.R.; Jiang, B.; Yuan, H.; Zeng, S. Simvastatin pharmacokinetics in healthy chinese subjects and its relations with *cyp2c9*, *cyp3a5*, *abcb1*, *abcg2* and *slco1b1* polymorphisms. *Die Pharmazie* **2013**, *68*, 124-128.
87. Finkelman, R.D.; Wang, T.D.; Wang, Y.; Azumaya, C.T.; Birmingham, B.K.; Wissmar, J.; Mosqueda-Garcia, R. Effect of *cyp2c19* polymorphism on the pharmacokinetics of rosuvastatin in healthy taiwanese subjects. *Clinical pharmacology in drug development* **2015**, *4*, 33-40.
88. Yin, O.Q.; Mak, V.W.; Hu, M.; Fok, B.S.; Chow, M.S.; Tomlinson, B. Impact of *cyp2d6* polymorphisms on the pharmacokinetics of lovastatin in chinese subjects. *European journal of clinical pharmacology* **2012**, *68*, 943-949.

89. Choi, H.Y.; Bae, K.S.; Cho, S.H.; Ghim, J.L.; Choe, S.; Jung, J.A.; Jin, S.J.; Kim, H.S.; Lim, H.S. Impact of cyp2d6, cyp3a5, cyp2c19, cyp2a6, slco1b1, abcb1, and abcg2 gene polymorphisms on the pharmacokinetics of simvastatin and simvastatin acid. *Pharmacogenetics and genomics* **2015**, *25*, 595-608.
90. Kitzmiller, J.P.; Luzum, J.A.; Baldassarre, D.; Krauss, R.M.; Medina, M.W. Cyp3a4\*22 and cyp3a5\*3 are associated with increased levels of plasma simvastatin concentrations in the cholesterol and pharmacogenetics study cohort. *Pharmacogenetics and genomics* **2014**, *24*, 486-491.
91. Shin, J.; Pauly, D.F.; Pacanowski, M.A.; Langae, T.; Frye, R.F.; Johnson, J.A. Effect of cytochrome p450 3a5 genotype on atorvastatin pharmacokinetics and its interaction with clarithromycin. *Pharmacotherapy* **2011**, *31*, 942-950.
92. Kim, K.A.; Park, P.W.; Lee, O.J.; Kang, D.K.; Park, J.Y. Effect of polymorphic cyp3a5 genotype on the single-dose simvastatin pharmacokinetics in healthy subjects. *Journal of clinical pharmacology* **2007**, *47*, 87-93.
93. Stormo, C.; Bogsrud, M.P.; Hermann, M.; Asberg, A.; Piehler, A.P.; Retterstol, K.; Kringen, M.K. Ugt1a1\*28 is associated with decreased systemic exposure of atorvastatin lactone. *Molecular diagnosis & therapy* **2013**, *17*, 233-237.
94. Riedmaier, S.; Klein, K.; Hofmann, U.; Keskitalo, J.E.; Neuvonen, P.J.; Schwab, M.; Niemi, M.; Zanger, U.M. Udp-glucuronosyltransferase (ugt) polymorphisms affect atorvastatin lactonization in vitro and in vivo. *Clinical pharmacology and therapeutics* **2010**, *87*, 65-73.
95. Cho, S.K.; Oh, E.S.; Park, K.; Park, M.S.; Chung, J.Y. The ugt1a3\*2 polymorphism affects atorvastatin lactonization and lipid-lowering effect in healthy volunteers. *Pharmacogenetics and genomics* **2012**, *22*, 598-605.
